# Supplementary material for: Rheo-Fermentation Dough Properties, Bread-Making Quality and Aroma Characteristics of Red Bean (Vigna angularis) Sourdough Induced by LAB Weissella confusa QS813 Strain Fermentation
Source: MDPI journal article supplement (doi:10.3390/foods12030605), 2023-02-01
Supplement: s1 [file s1]

**Table S1.** Composition of controls and red bean sourdough bread.

| Ingredient (s)         | Sample |        |     |       |     |
|------------------------|--------|--------|-----|-------|-----|
|                        | WR     | EWR    | CR  | AWR   | CW  |
| Wheat flour (g)        | 90     | 89.81  | 90  | 90    | 100 |
| Water (mL)             | 66     | 66     | 66  | 66 ** | 66  |
| Red bean flour (g)     | -      | 10     | 10  | 10    | -   |
| Red bean sourdough (g) | 10     | -      | -   | -     | -   |
| EPS (g)                | -      | 0.19 * | -   | -     | -   |
| Yeast (g)              | 2      | 2      | 2   | 2     | 2   |
| Butter (g)             | 8      | 8      | 8   | 8     | 8   |
| Sugar (g)              | 10     | 10     | 10  | 10    | 10  |
| Salt (g)               | 1.5    | 1.5    | 1.5 | 1.5   | 1.5 |

WR: Red bean sourdough dough. EWR: Red bean flour dough, containing EPS extracted from red bean sourdough fermented by *W. confusa* QS813. CR: Red bean flour dough. AWR: Red kidney bean flour dough, chemically acidified to similar pH as WR. CW: Wheat flour dough. \* EPS was extracted from red bean sourdough fermented by *W. confusa* QS813 as described by Tang et al. [20]. \*\* Chemically acidified using acetic acid and lactic acid at a molar ratio of 0.66:0.33.
